# Supplementary material for: Stereoselective Synthesis, Pro-resolution, and Anti-inflammatory Actions of RvD5n-3 DPA
Source: PubMed Central journal article supplement (PMC10683074; doi:10.1021/acs.jnatprod.3c00769), 2023-10-25
Supplement: np3c00769_si_001.pdf [file np3c00769_si_001.pdf]

# Supporting information for Stereoselective Synthesis, Pro-resolution and Anti-inflammatory Bioactions of RvD5<sub>n-3</sub> DPA

Karina Ervik,<sup>a</sup> Amalie F. Reinertsen,<sup>a</sup> Duco S. Koenis,<sup>b</sup> Jesmond Dalli<sup>b</sup> and Trond V. Hansen<sup>a</sup>

<sup>a</sup> *Department of Pharmacy, Section for Pharmaceutical Chemistry, University of Oslo, PO Box 1068, N-0316, Oslo, Norway.*

<sup>b</sup> *Lipid Mediator Unit, Center for Biochemical Pharmacology, William Harvey Research Institute, Barts and The London School of Medicine, Queen Mary University of London, Charterhouse Square, London EC1M 6BQ, UK*

## Table of Contents

|                                                      |      |
|------------------------------------------------------|------|
| <sup>1</sup> H and <sup>13</sup> C NMR-Spectra ..... | S-2  |
| UV-Vis Spectrum.....                                 | S-8  |
| HPLC Chromatograms .....                             | S-10 |
| HRMS Spectra.....                                    | S-13 |

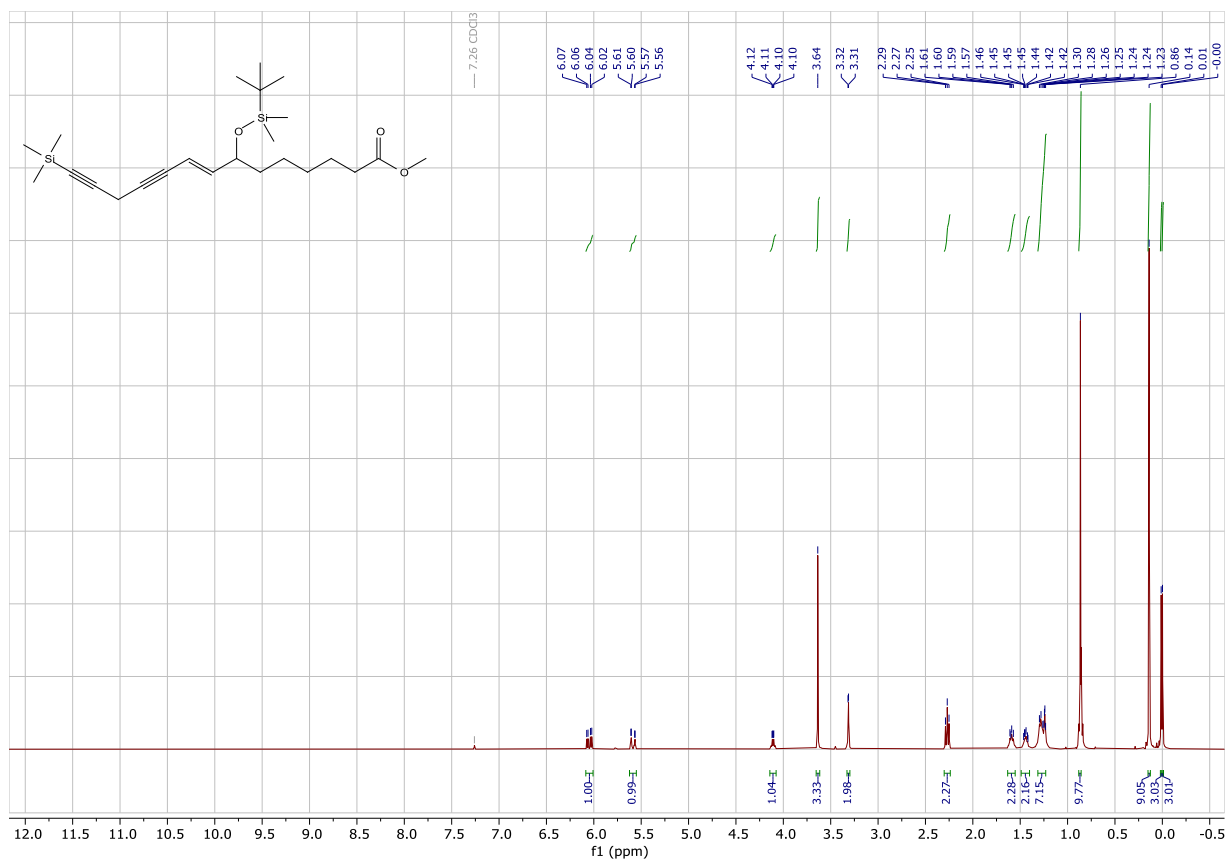

Figure S-1.  $^1\text{H}$  NMR spectrum of compound **8**,  $\text{CDCl}_3$ , 400 MHz.

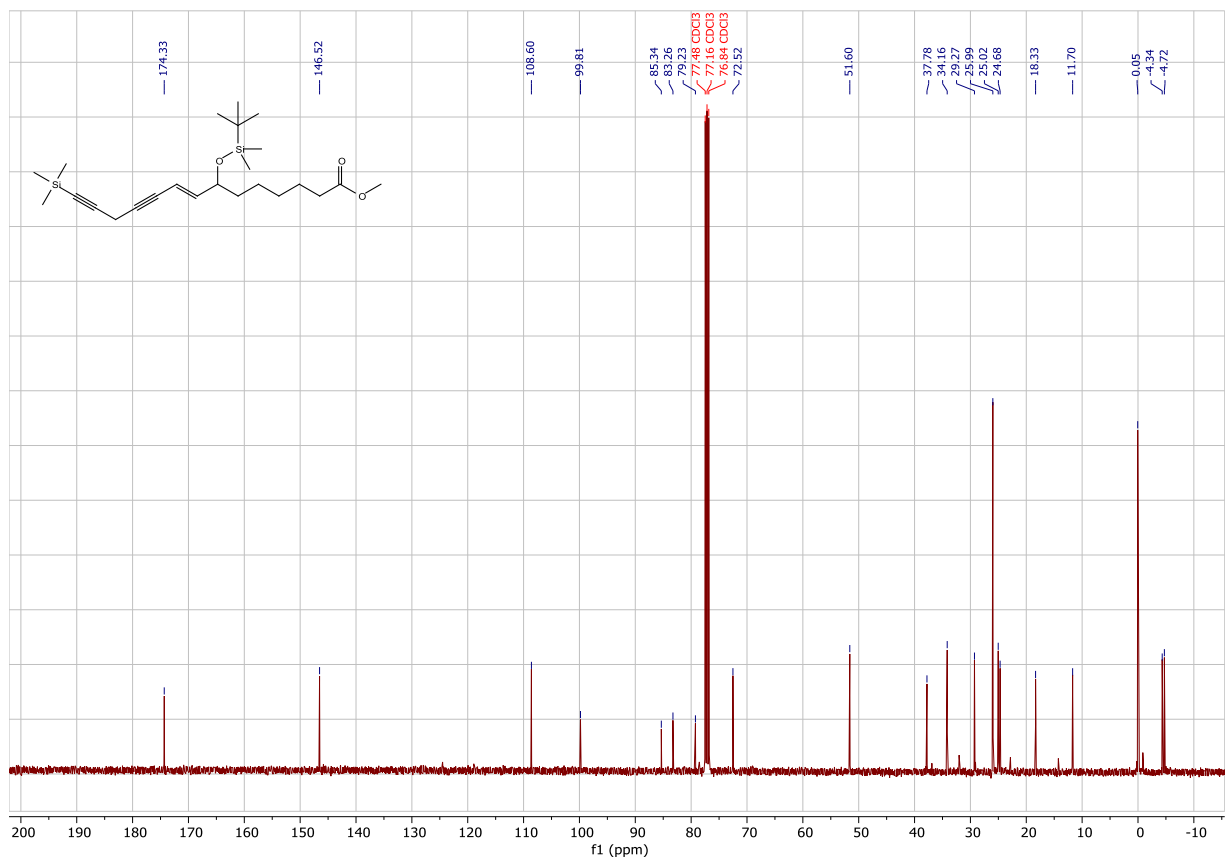

Figure S-2.  $^{13}\text{C}$  NMR spectrum of compound **8**,  $\text{CDCl}_3$ , 100 MHz.

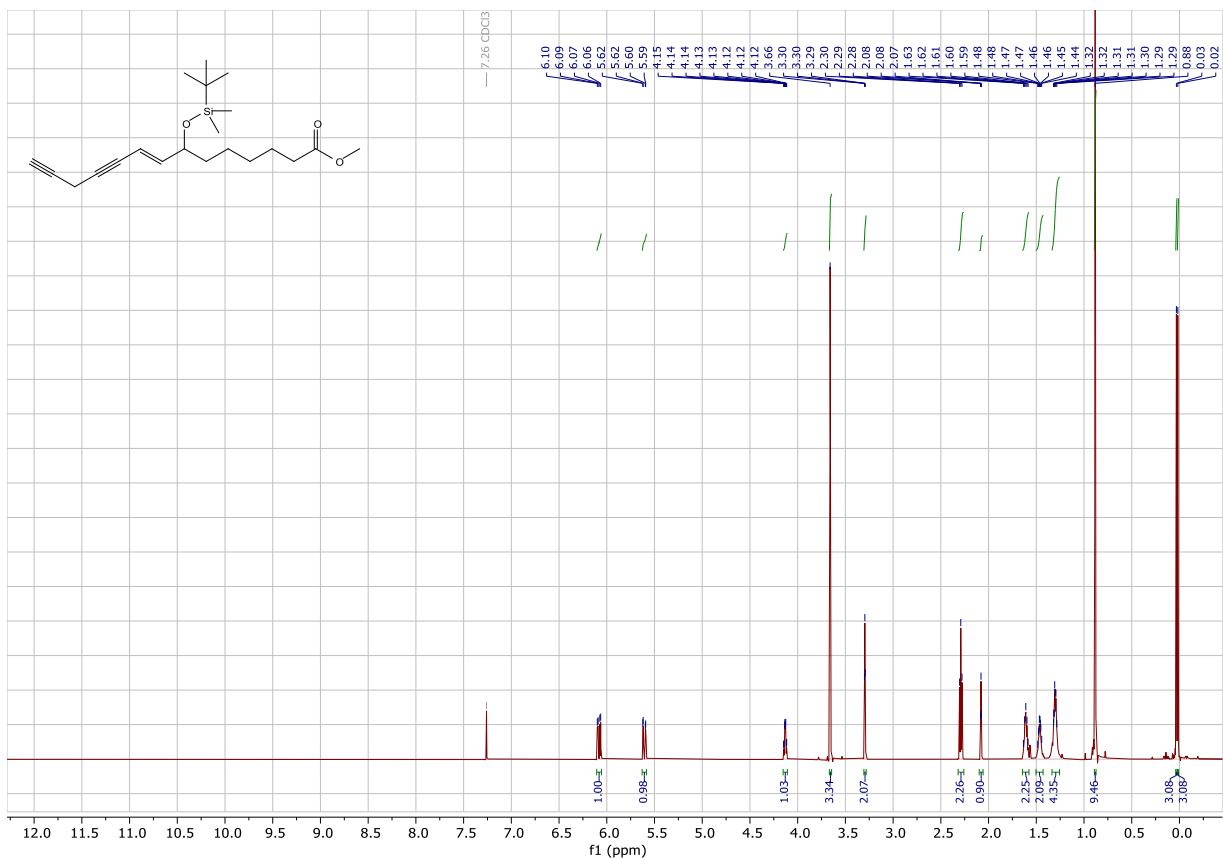

Figure S-3.  $^1\text{H}$  NMR spectrum of compound **9**,  $\text{CDCl}_3$ , 400 MHz.

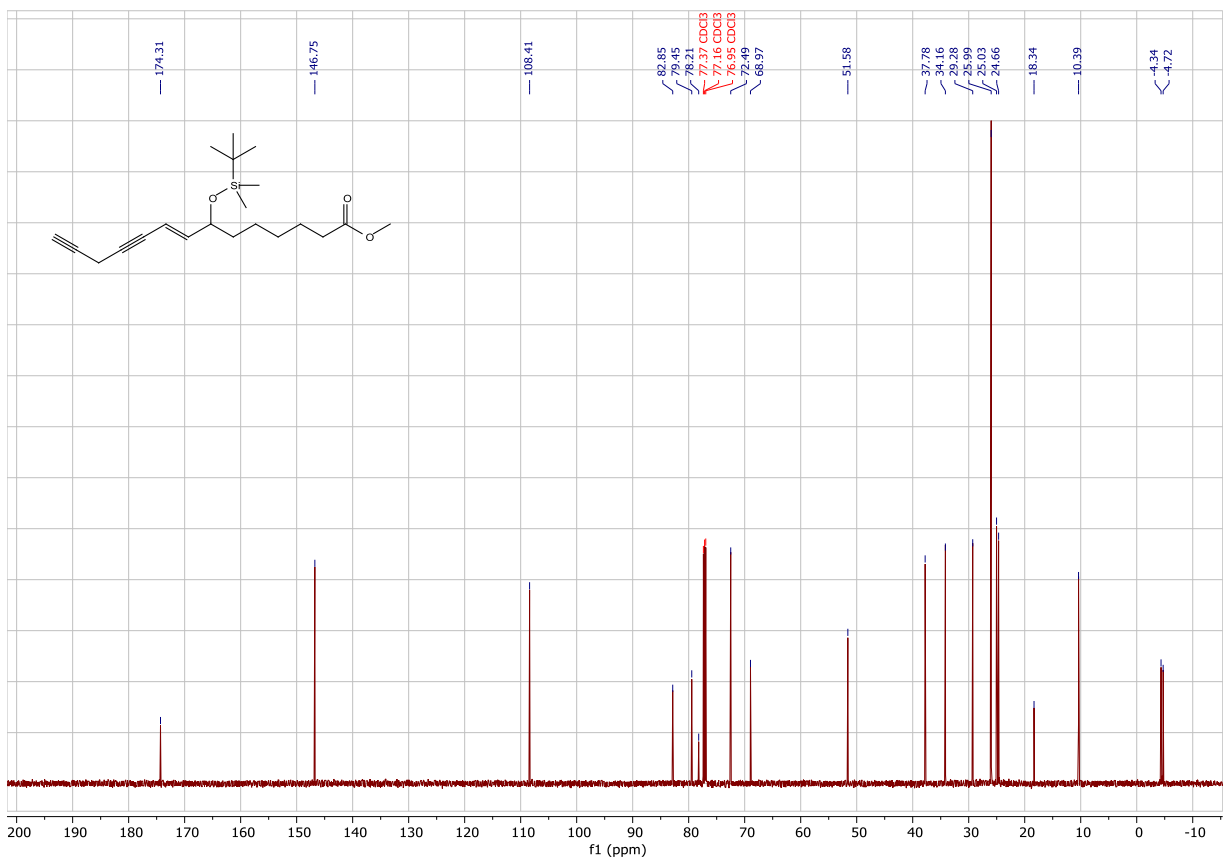

Figure S-4.  $^{13}\text{C}$  NMR spectrum of compound **9**,  $\text{CDCl}_3$ , 100 MHz.

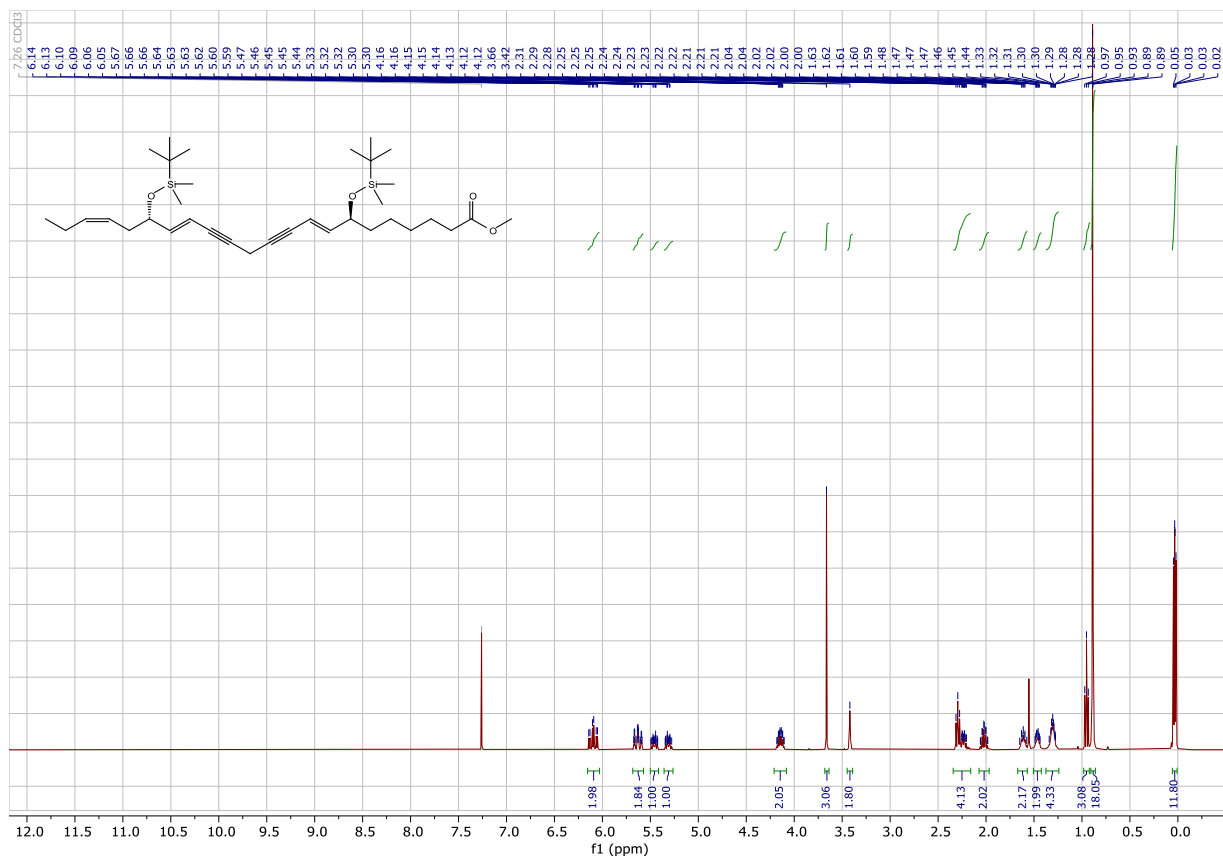

Figure S-5. <sup>1</sup>H NMR spectrum of compound **10**, CDCl<sub>3</sub>, 400 MHz.

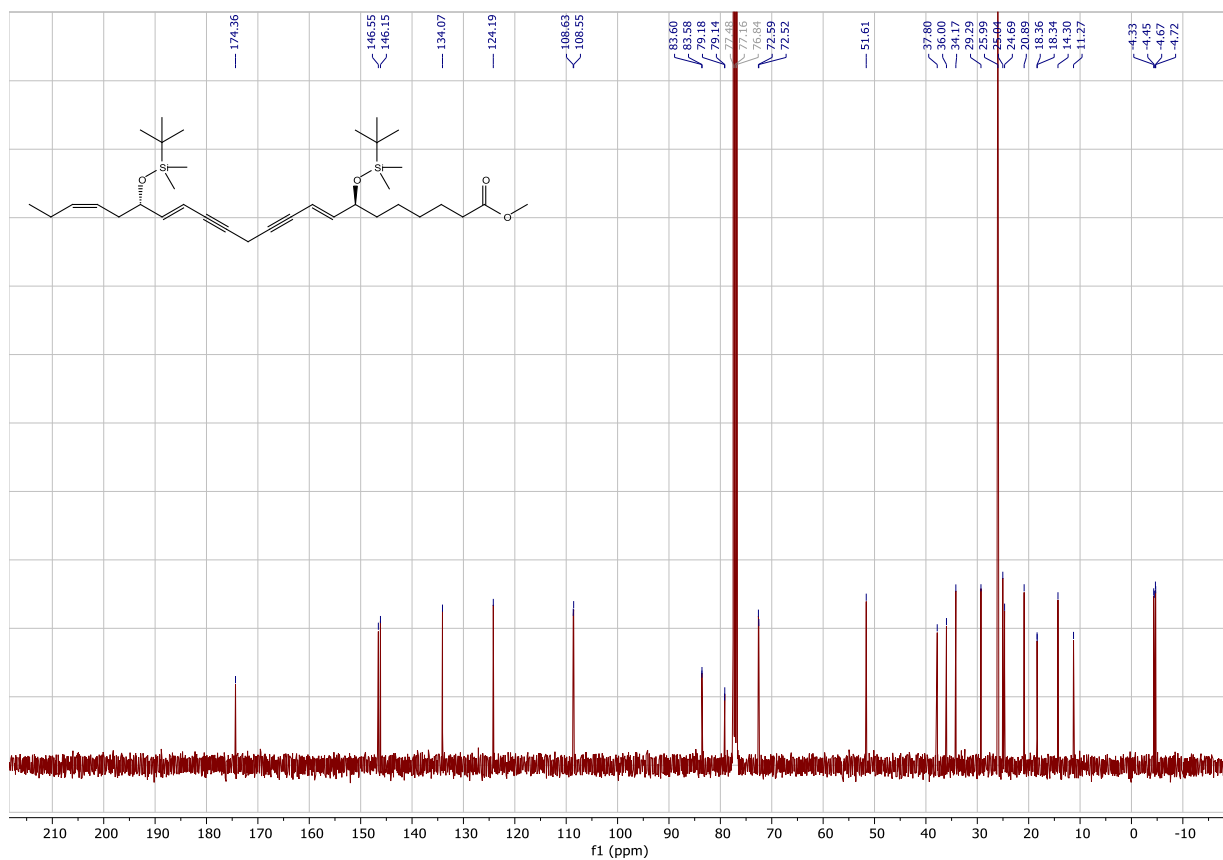

Figure S-6. <sup>13</sup>C NMR spectrum of compound **10**, CDCl<sub>3</sub>, 100 MHz.

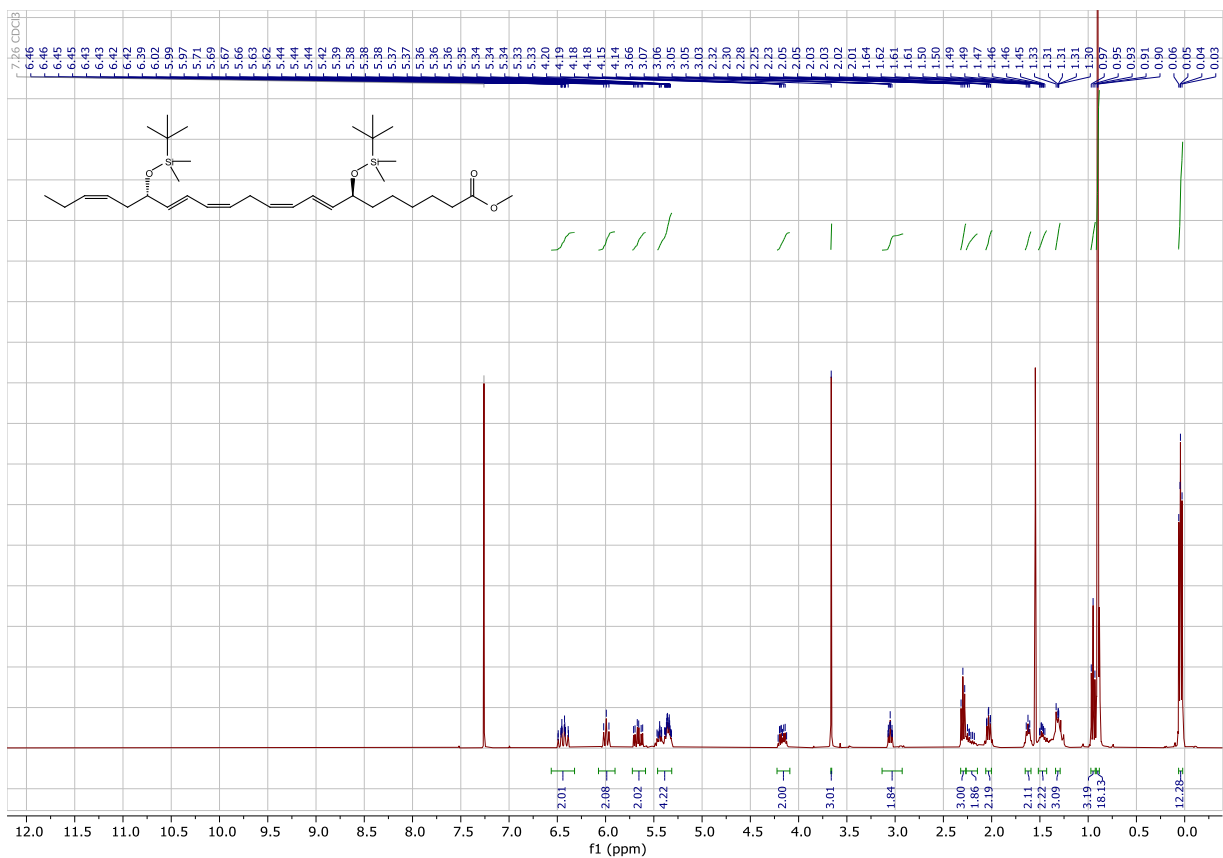

Figure S-7. <sup>1</sup>H NMR spectrum of compound 11, CDCl<sub>3</sub>, 400 MHz.

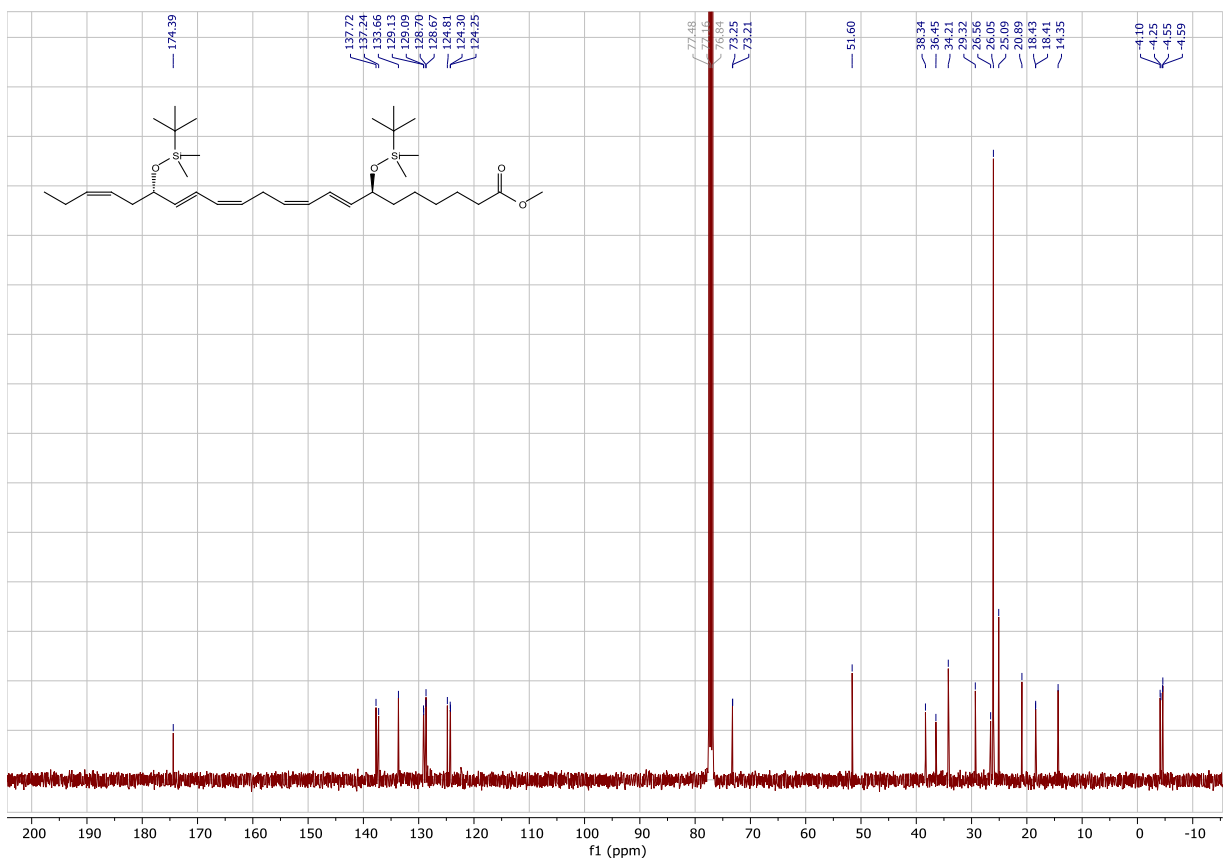

Figure S-8. <sup>13</sup>C NMR spectrum of compound 11, CDCl<sub>3</sub>, 100 MHz.

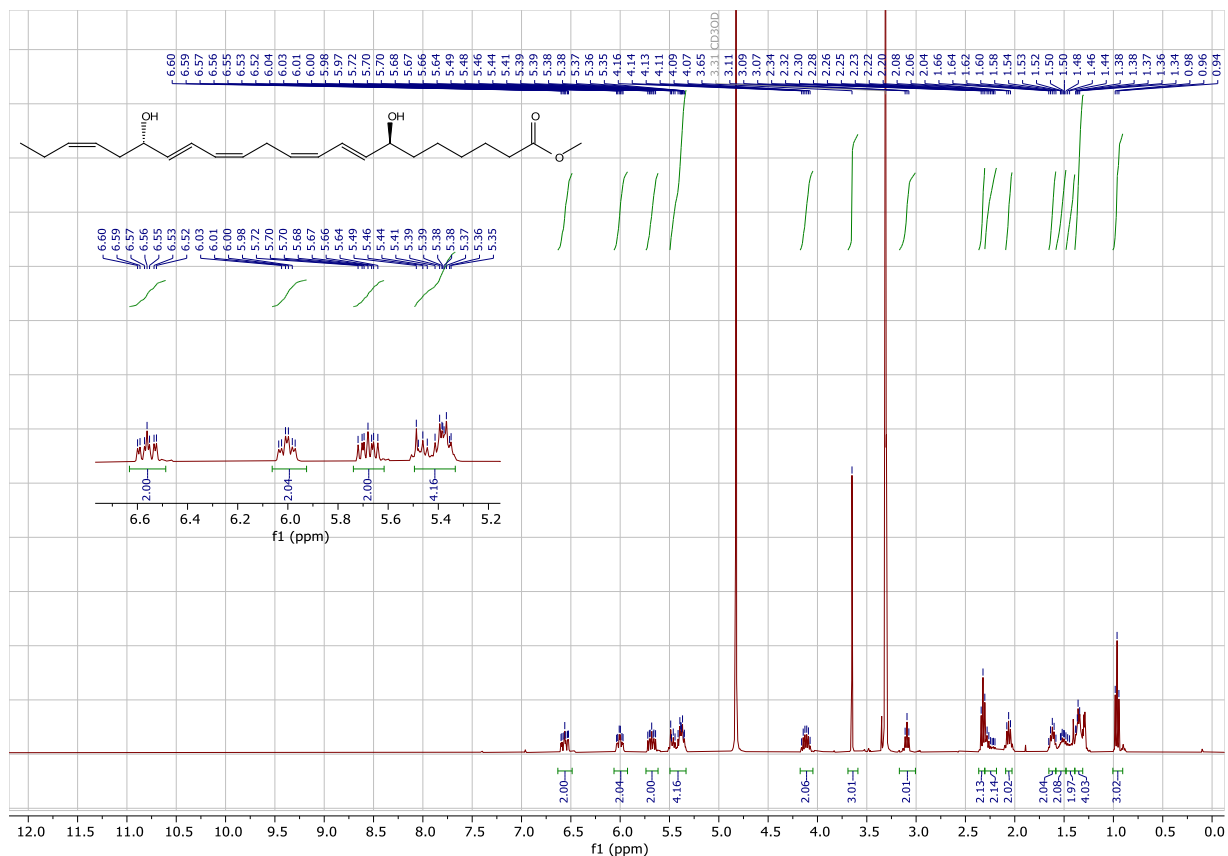

Figure S-9. <sup>1</sup>H NMR spectrum of compound RvD5<sub>n-3</sub> DPA methyl ester **2**, CD<sub>3</sub>OD, 400 MHz.

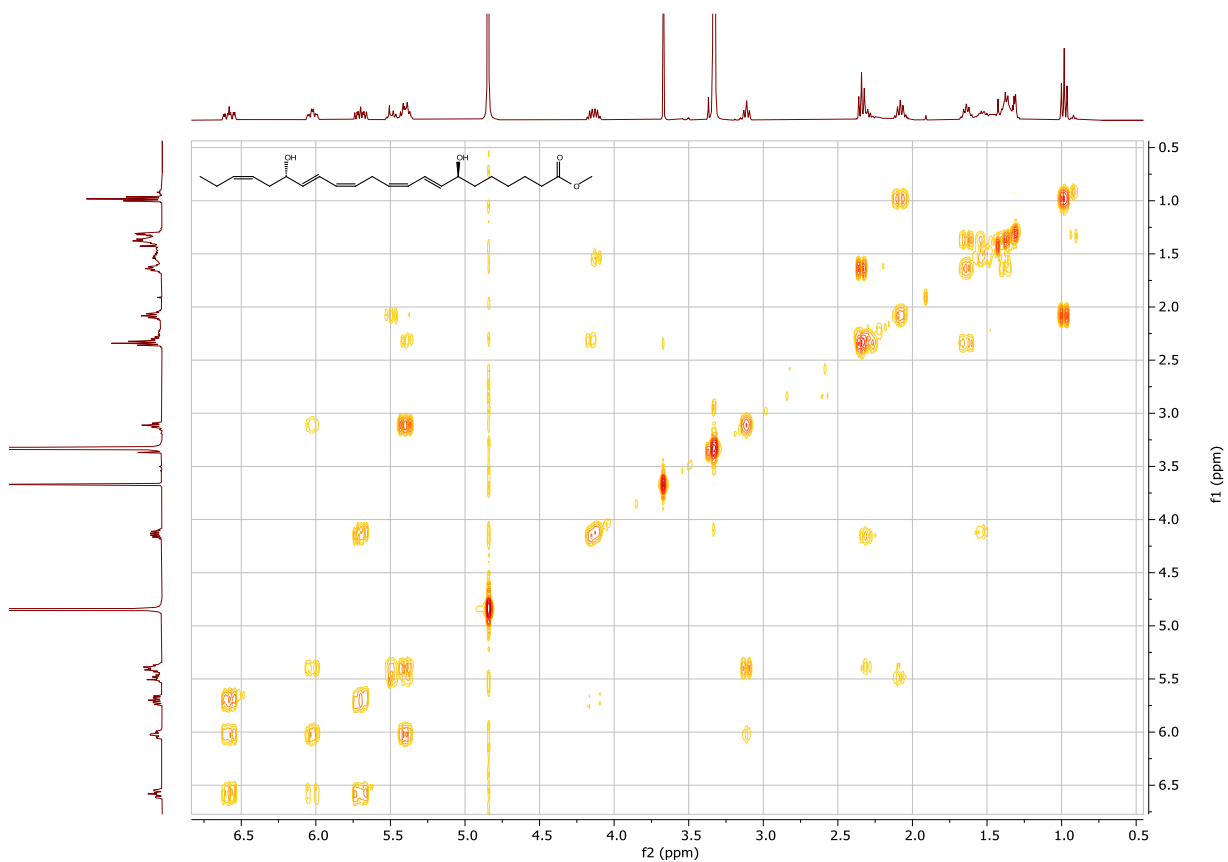

Figure S-10. COSY-spectrum of RvD5<sub>n-3</sub> DPA methyl ester **2**, CD<sub>3</sub>OD, 400 MHz.

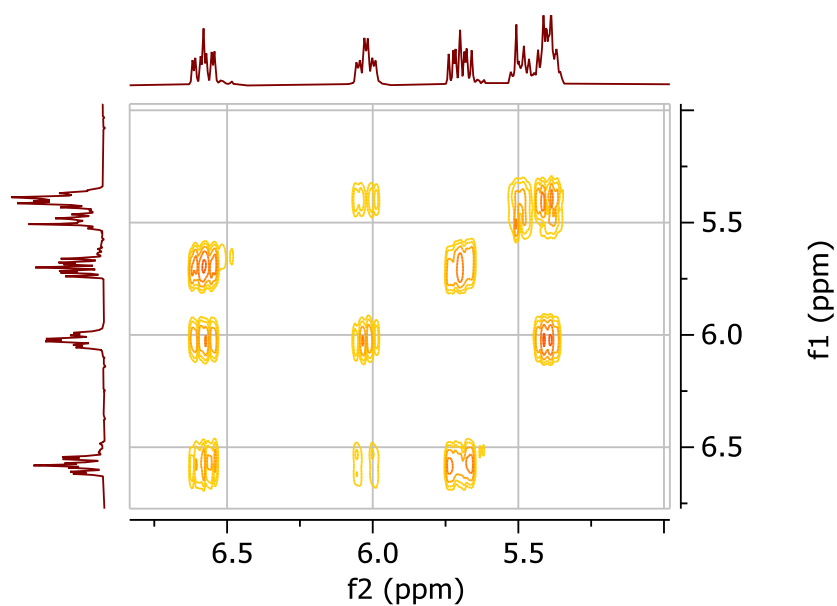

Figure S-11. Expansion of the olefinic area in the COSY NMR spectrum of RvD5<sub>n-3</sub> DPA methyl ester **2**.

| Position                                                              | $\delta$ (mult, J/Hz)                    |
|-----------------------------------------------------------------------|------------------------------------------|
| H <sub>9</sub> , H <sub>15</sub>                                      | 6.56 (ddd, $J = 15.0, 11.1, 3.9$ Hz, 2H) |
| H <sub>10</sub> , H <sub>14</sub>                                     | 6.00 (td, $J = 10.8, 4.6$ Hz, 2H)        |
| H <sub>8</sub> , H <sub>16</sub>                                      | 5.68 (ddd, $J = 15.7, 9.8, 6.6$ Hz, 2H)  |
| H <sub>11</sub> , H <sub>13</sub> , H <sub>19</sub> , H <sub>20</sub> | 5.49 – 5.35 (m, 4H)                      |

Table S-1. Interpretation of the double bond geometry in RvD5<sub>n-3</sub> DPA methyl ester (**2**).

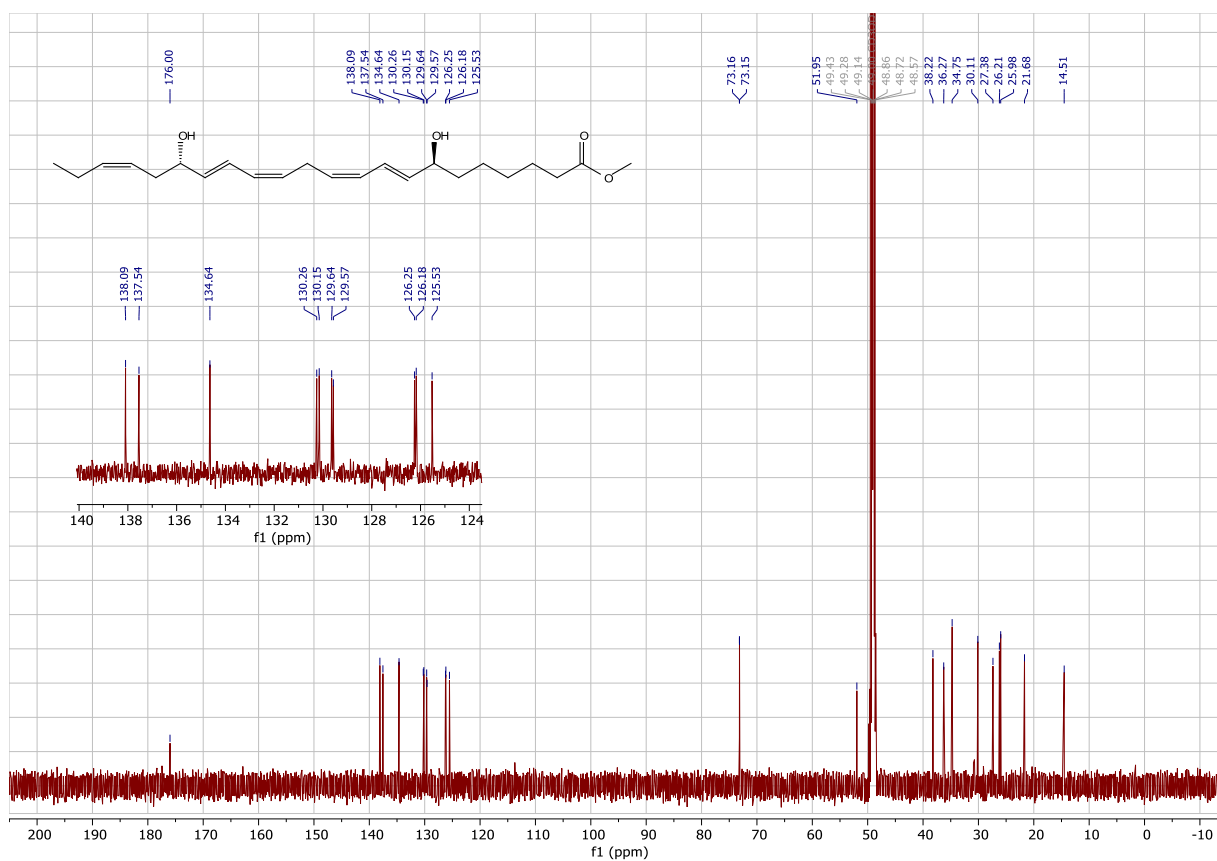

Figure S-12.  $^{13}\text{C}$  NMR spectrum of RvD5<sub>n-3</sub> DPA methyl ester **2**,  $\text{CD}_3\text{OD}$ , 150 MHz.

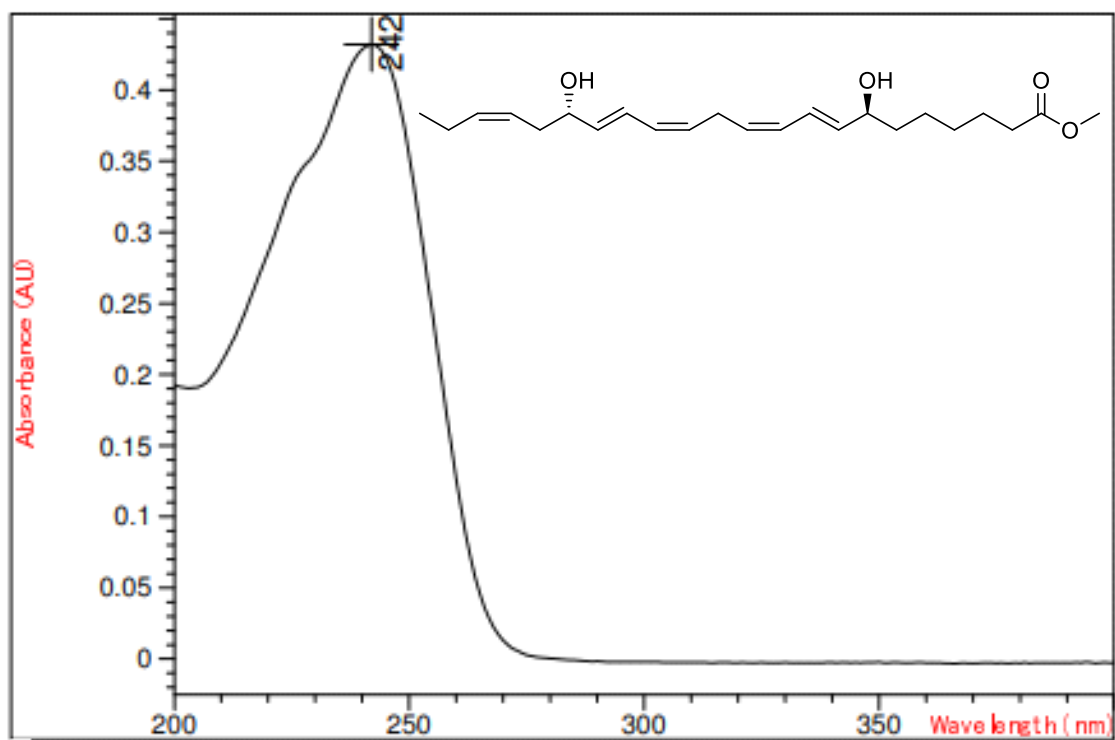

Figure S-13. UV-Vis of RvD5<sub>n-3</sub> DPA methyl ester **2** in MeOH.



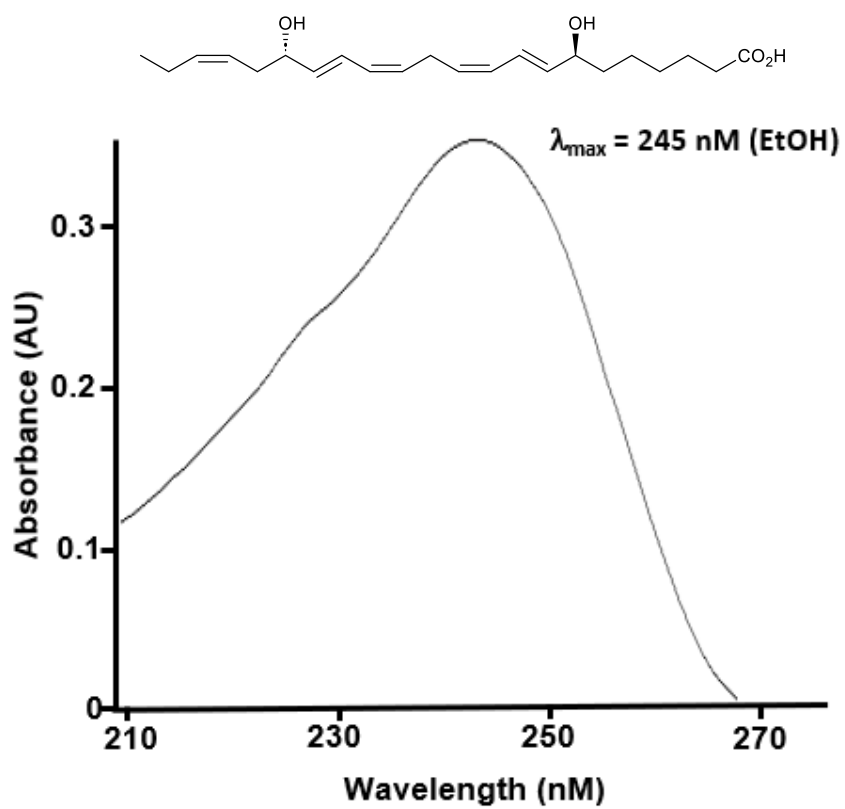

Figure S-14. UV-Vis of RvD5<sub>n-3</sub> DPA 1.

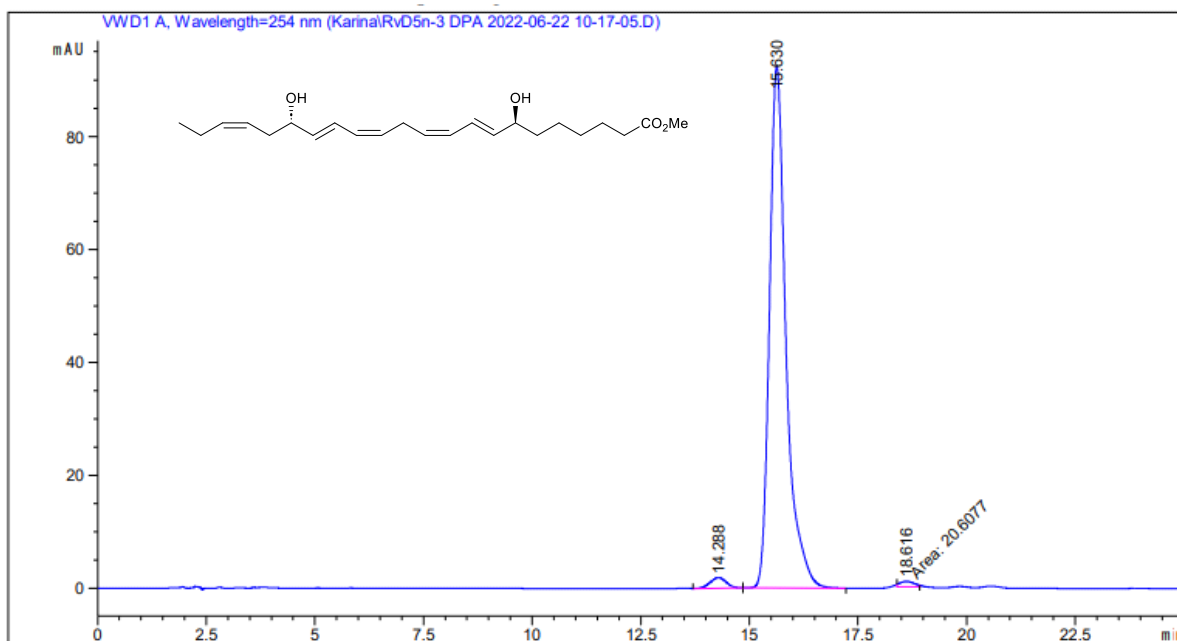

=====  
 Area Percent Report  
 =====

Sorted By : Signal  
 Multiplier : 1.0000  
 Dilution : 1.0000  
 Use Multiplier & Dilution Factor with ISTDs

Signal 1: VWD1 A, Wavelength=254 nm

| Peak # | RetTime [min] | Type | Width [min] | Area [mAU*s] | Height [mAU] | Area %  |
|--------|---------------|------|-------------|--------------|--------------|---------|
| 1      | 14.288        | BB   | 0.3929      | 48.07434     | 1.87654      | 1.9158  |
| 2      | 15.630        | BB   | 0.3974      | 2440.66089   | 92.33601     | 97.2629 |
| 3      | 18.616        | MM   | 0.3787      | 20.60766     | 9.06916e-1   | 0.8212  |

**Figure S-15.** HPLC chromatogram of RvD5<sub>n-3</sub> DPA methyl ester 2.

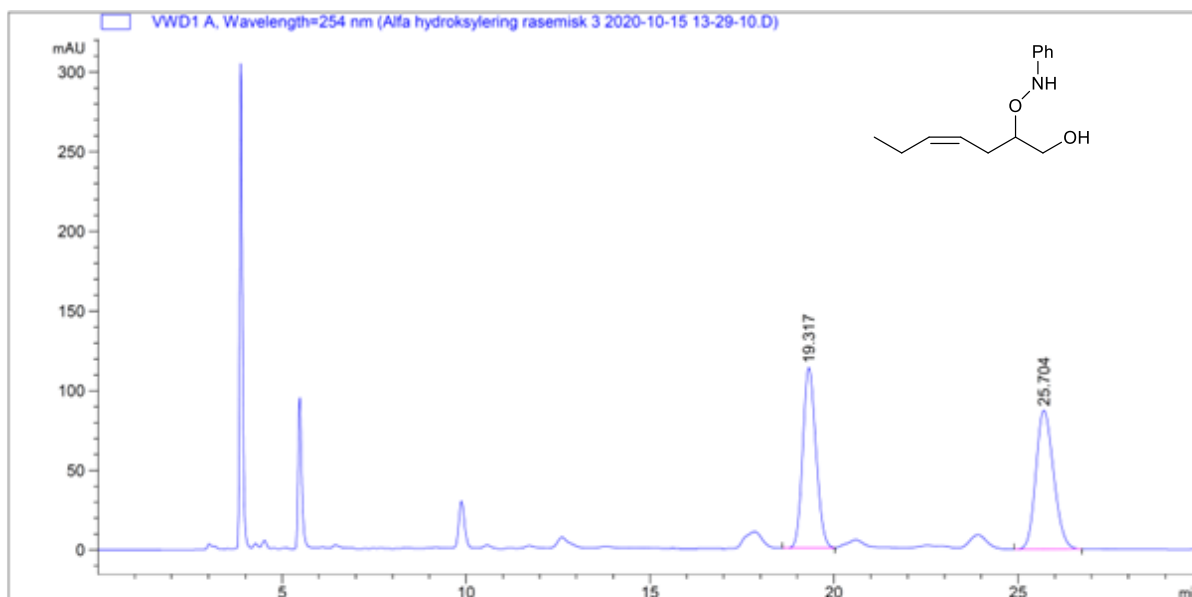

=====  
 Area Percent Report  
 =====

Sorted By : Signal  
 Multiplier : 1.0000  
 Dilution : 1.0000  
 Use Multiplier & Dilution Factor with ISTDs

Signal 1: VWD1 A, Wavelength=254 nm

| Peak # | RetTime [min] | Type | Width [min] | Area [mAU*s] | Height [mAU] | Area %  |
|--------|---------------|------|-------------|--------------|--------------|---------|
| 1      | 19.317        | BV   | 0.3891      | 2837.64722   | 113.32843    | 49.2803 |
| 2      | 25.704        | BB   | 0.5210      | 2920.53052   | 87.13389     | 50.7197 |

Totals :                    5758.17773   200.46232

Figure S-16. HPLC chromatogram of racemic  $\alpha$ -aminoxylated alcohol intermediate of compound 7.

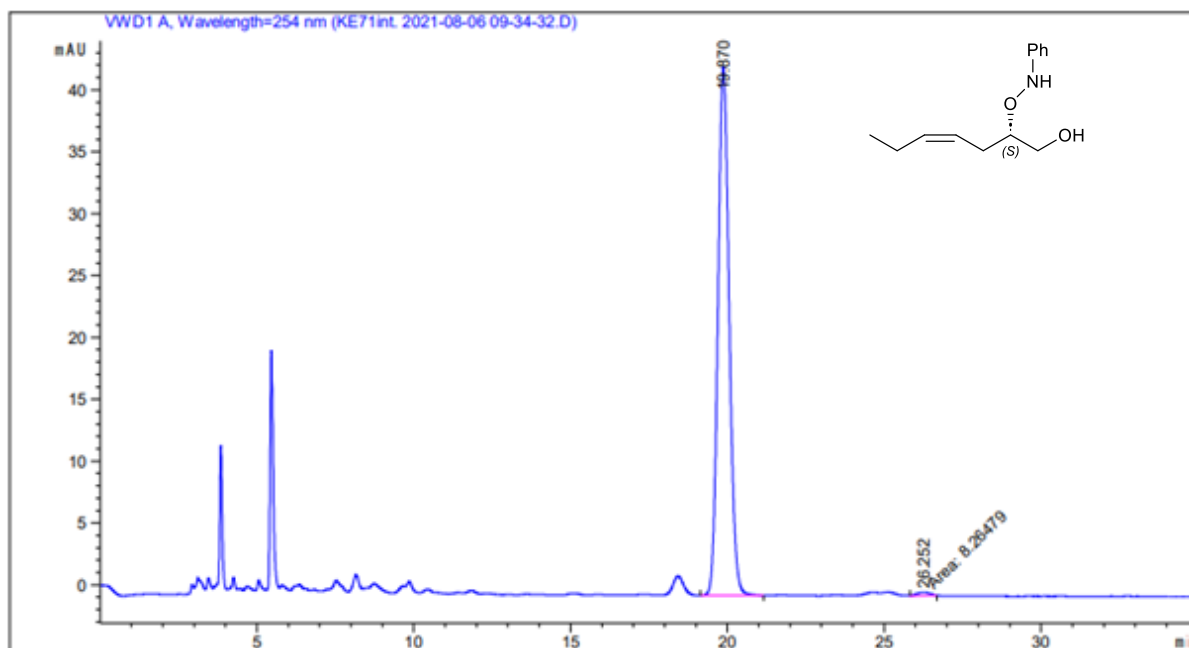

=====  
 Area Percent Report  
 =====

Sorted By : Signal  
 Multiplier : 1.0000  
 Dilution : 1.0000  
 Use Multiplier & Dilution Factor with ISTDs

Signal 1: VWD1 A, Wavelength=254 nm

| Peak # | RetTime [min] | Type | Width [min] | Area [mAU*s] | Height [mAU] | Area %  |
|--------|---------------|------|-------------|--------------|--------------|---------|
| 1      | 19.870        | BB   | 0.3840      | 1057.72974   | 42.69299     | 99.2247 |
| 2      | 26.252        | MM   | 0.4983      | 8.26479      | 2.76407e-1   | 0.7753  |

**Figure S-17.** HPLC chromatogram of optical  $\alpha$ -aminoxylated alcohol intermediate of compound **7**.

# Elemental Analysis Report

|                      |                      |                  |                           |
|----------------------|----------------------|------------------|---------------------------|
| <b>Analysis Info</b> |                      | Acquisition Date | 9/27/2021 10:07:42 AM     |
| Sample Name          | KE79                 | Analysis Name    | D:\Data\maxis2021\18137.d |
| Method               | ESI_pos_50_1500_os.m |                  |                           |

## Acquisition Parameter

|             |            |                      |          |                  |           |
|-------------|------------|----------------------|----------|------------------|-----------|
| Source Type | ESI        | Ion Polarity         | Positive | Set Nebulizer    | 0.3 Bar   |
| Focus       | Not active | Set Capillary        | 3500 V   | Set Dry Heater   | 200 °C    |
| Scan Begin  | 50 m/z     | Set End Plate Offset | -500 V   | Set Dry Gas      | 4.0 l/min |
| Scan End    | 1500 m/z   | Set Charging Voltage | 2000 V   | Set Divert Valve | Waste     |
|             |            | Set Corona           | 0 nA     | Set APCI Heater  | 0 °C      |

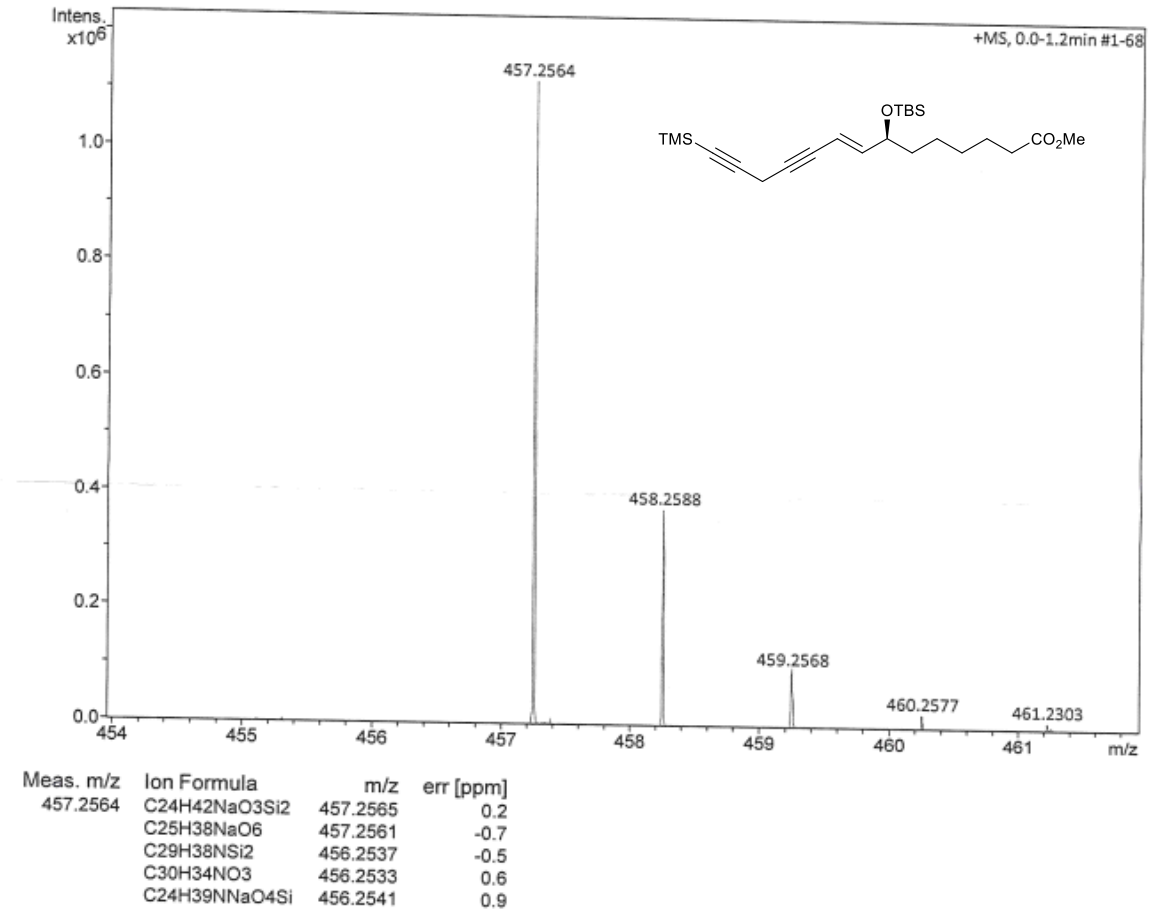

Figure S-18. HRMS spectrum of compound 8.

# Elemental Analysis Report

## Analysis Info

Sample Name KE80  
 Method ESI\_pos\_50\_1500\_os.m

Acquisition Date 05-Jan-22 3:48:15 PM  
 Analysis Name D:\Data\maxis2022\18362.d

## Acquisition Parameter

|             |            |                      |        |                  |           |
|-------------|------------|----------------------|--------|------------------|-----------|
| Source Type | ESI        | Set Capillary        | 3500 V | Set Nebulizer    | 0.3 Bar   |
| Focus       | Not active | Set End Plate Offset | -500 V | Set Dry Heater   | 200 °C    |
| Scan Begin  | 50 m/z     | Set Charging Voltage | 2000 V | Set Dry Gas      | 4.0 l/min |
| Scan End    | 1500 m/z   | Set Corona           | 0 nA   | Set Divert Valve | Waste     |
|             |            |                      |        | Set APCI Heater  | 0 °C      |

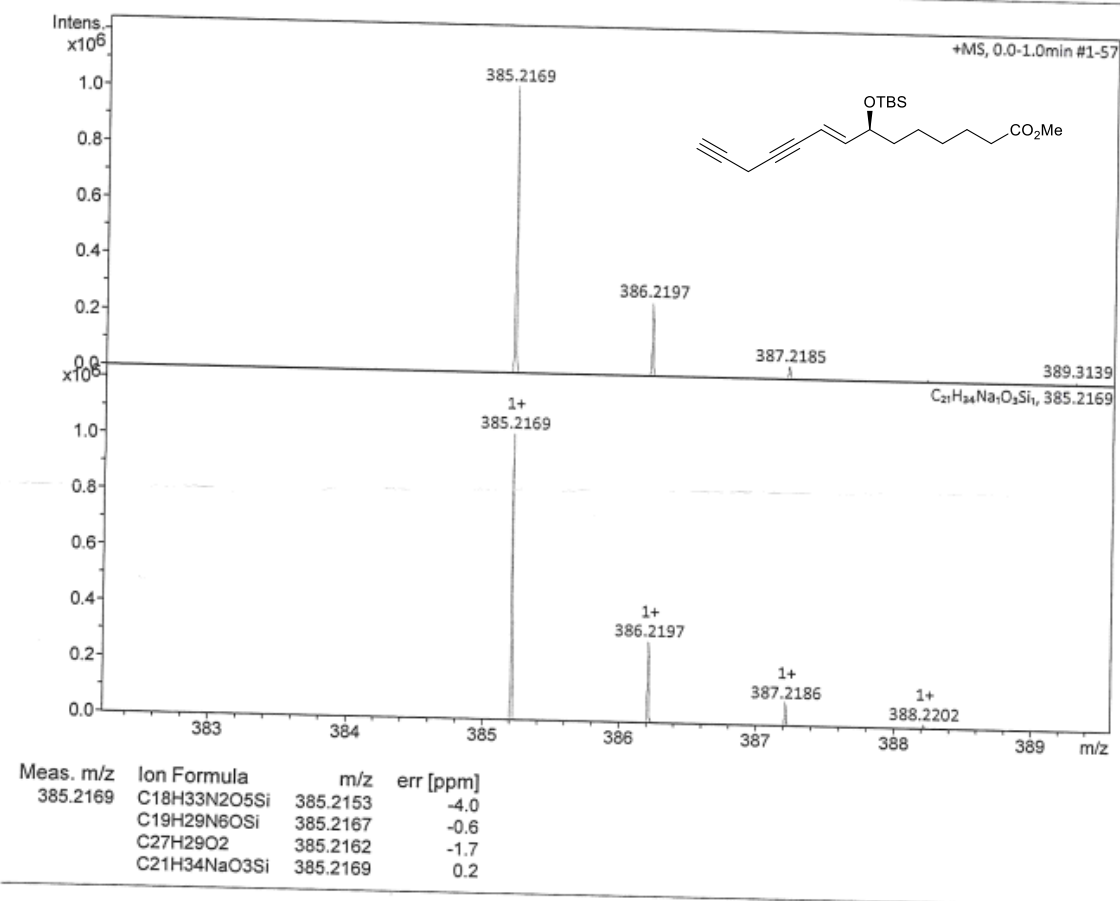

Figure S-19. HRMS spectrum of compound 9.

# Elemental Analysis Report

**Analysis Info**

Sample Name KE81

Method ESI\_pos\_50\_1500\_os.m

Acquisition Date 07-Jan-22 9:54:56 AM

Analysis Name D:\Data\maxis2022\18371.d

**Acquisition Parameter**

|             |            |                      |        |                  |           |
|-------------|------------|----------------------|--------|------------------|-----------|
| Source Type | ESI        | Set Capillary        | 3500 V | Set Nebulizer    | 0.3 Bar   |
| Focus       | Not active | Set End Plate Offset | -500 V | Set Dry Heater   | 200 °C    |
| Scan Begin  | 50 m/z     | Set Charging Voltage | 2000 V | Set Dry Gas      | 4.0 l/min |
| Scan End    | 1500 m/z   | Set Corona           | 0 nA   | Set Divert Valve | Waste     |
|             |            |                      |        | Set APCI Heater  | 0 °C      |

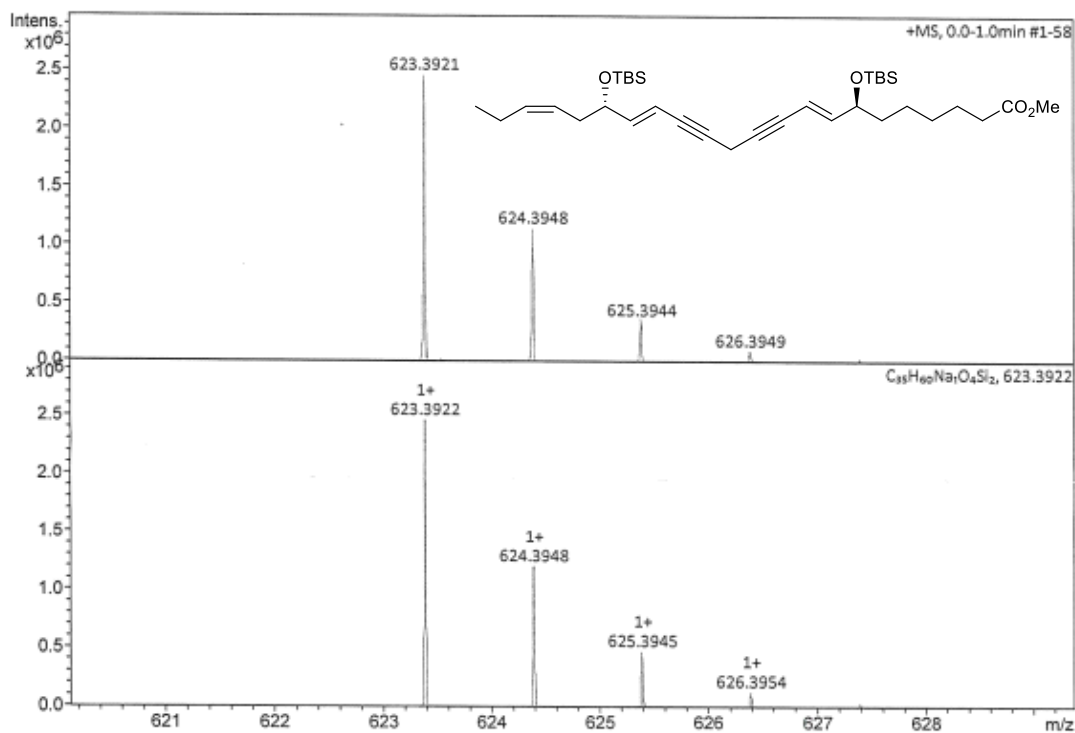

| Meas. m/z | Ion Formula   | m/z      | err [ppm] |
|-----------|---------------|----------|-----------|
| 623.3921  | C36H54N3O4Si  | 620.3878 | 0.8       |
|           | C41H55O3Si    | 623.3915 | -1.0      |
|           | C34H51N6O5    | 623.3915 | -1.0      |
|           | C40H56NOSi2   | 622.3895 | -0.0      |
|           | C41H52NO4     | 622.3891 | 0.5       |
|           | C36H57N2O3Si2 | 621.3902 | 0.6       |
|           | C35H60NaO4Si2 | 623.3922 | 0.1       |
|           | C36H56NaO7    | 623.3918 | -0.5      |
|           | C35H57NNaO5Si | 622.3898 | 1.0       |
|           | C38H51N3NaO3  | 620.3823 | -0.9      |

Figure S-20. HRMS spectrum of compound 10.

# Elemental Analysis Report

**Analysis Info**

Sample Name KE107.1  
 Method ESI\_pos\_50\_1500\_os.m

Acquisition Date 10-Jun-22 1:33:06 PM  
 Analysis Name D:\Data\maxis2022\18912.d

**Acquisition Parameter**

|             |            |                      |        |                  |           |
|-------------|------------|----------------------|--------|------------------|-----------|
| Source Type | ESI        | Set Capillary        | 3500 V | Set Nebulizer    | 0.5 Bar   |
| Focus       | Not active | Set End Plate Offset | -500 V | Set Dry Heater   | 200 °C    |
| Scan Begin  | 50 m/z     | Set Charging Voltage | 2000 V | Set Dry Gas      | 4.0 l/min |
| Scan End    | 1500 m/z   | Set Corona           | 0 nA   | Set Divert Valve | Waste     |
|             |            |                      |        | Set APCI Heater  | 0 °C      |

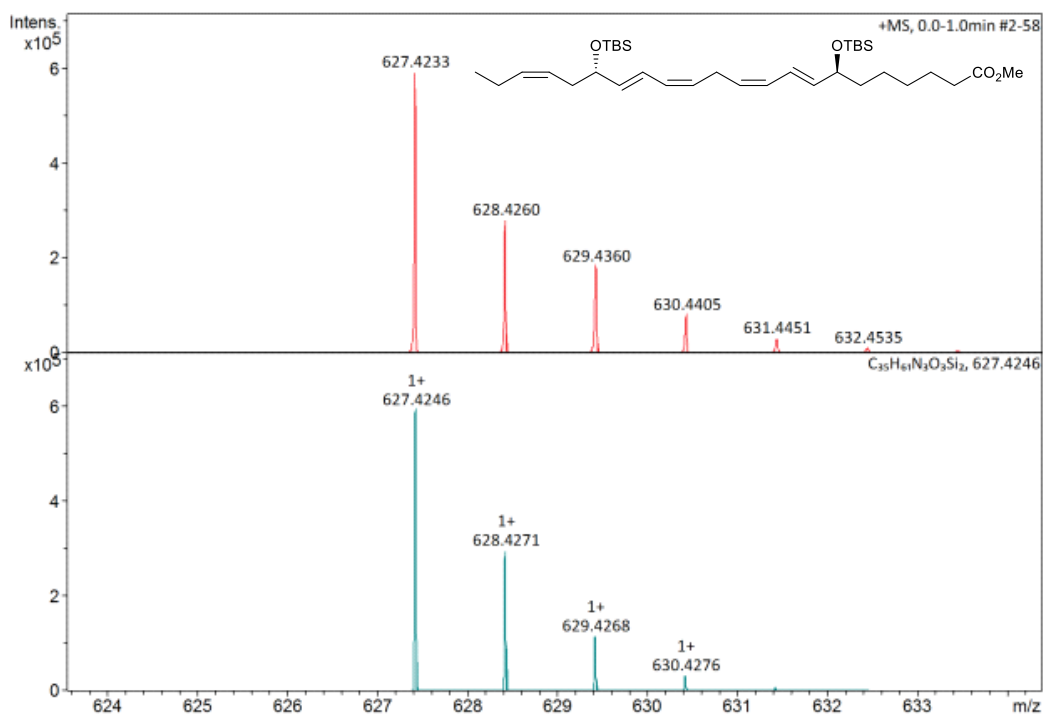

| Meas. m/z | Ion Formula                                                                   | m/z      | err [ppm] |
|-----------|-------------------------------------------------------------------------------|----------|-----------|
| 627.4233  | C <sub>33</sub> H <sub>59</sub> N <sub>6</sub> O <sub>2</sub> Si <sub>2</sub> | 627.4233 | -0.1      |
|           | C <sub>35</sub> H <sub>64</sub> NaO <sub>4</sub> Si <sub>2</sub>              | 627.4235 | 0.3       |

**Figure S-21.** HRMS spectrum of compound **11**.



# Elemental Analysis Report

**Analysis Info**

Sample Name KE108  
 Method ESI\_pos\_50\_1500\_os.m

Acquisition Date 21-Jun-22 1:02:18 PM  
 Analysis Name D:\Data\maxis2022\18949.d

**Acquisition Parameter**

|             |            |                      |        |                  |           |
|-------------|------------|----------------------|--------|------------------|-----------|
| Source Type | ESI        | Set Capillary        | 3500 V | Set Nebulizer    | 0.5 Bar   |
| Focus       | Not active | Set End Plate Offset | -500 V | Set Dry Heater   | 200 °C    |
| Scan Begin  | 50 m/z     | Set Charging Voltage | 2000 V | Set Dry Gas      | 4.0 l/min |
| Scan End    | 1500 m/z   | Set Corona           | 0 nA   | Set Divert Valve | Waste     |
|             |            |                      |        | Set APCI Heater  | 0 °C      |

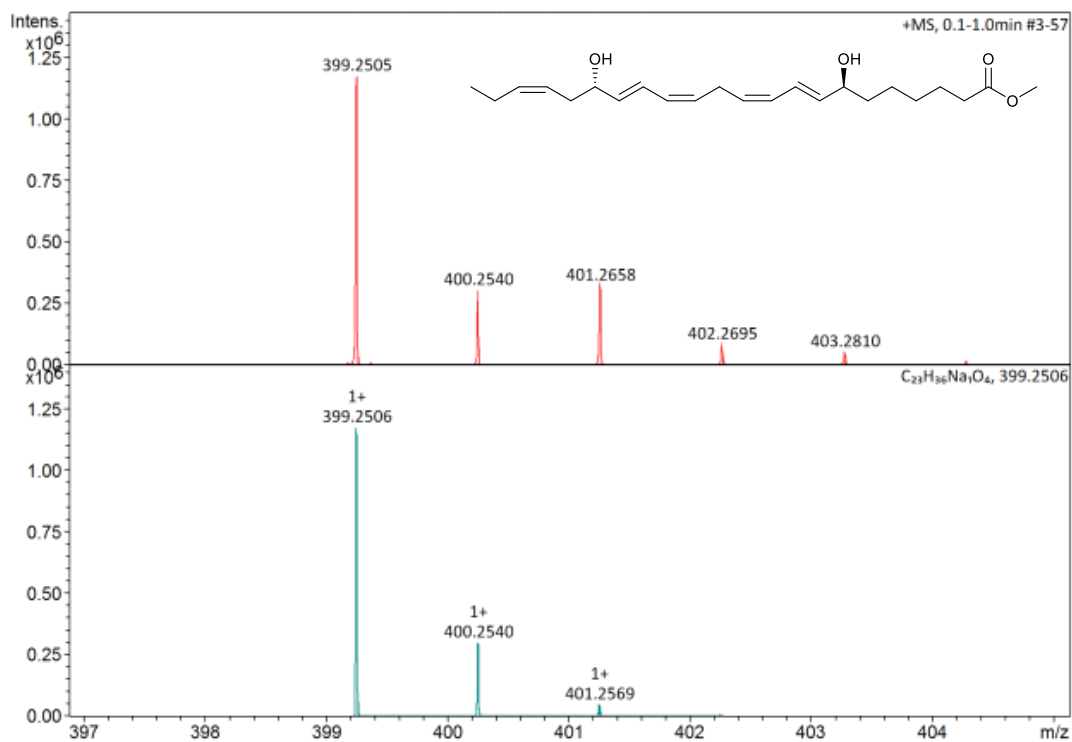

| Meas. m/z | Ion Formula                                                   | m/z      | err [ppm] |
|-----------|---------------------------------------------------------------|----------|-----------|
| 399.2505  | C <sub>21</sub> H <sub>31</sub> N <sub>6</sub> O <sub>2</sub> | 399.2503 | -0.5      |
|           | C <sub>23</sub> H <sub>36</sub> NaO <sub>4</sub>              | 399.2506 | 0.2       |
| 401.2658  | C <sub>21</sub> H <sub>33</sub> N <sub>6</sub> O <sub>2</sub> | 401.2660 | 0.5       |
|           | C <sub>23</sub> H <sub>38</sub> NaO <sub>4</sub>              | 401.2662 | 1.2       |

**Figure S-22.** HRMS spectrum of RvD5<sub>n-3</sub>-DPA methyl ester **2**.
